# Supplementary material
Source: PubMed Central journal article supplement (PMC4856155)
Supplement: NIHMS709167-supplement-supplement_1.pdf [file NIHMS709167-supplement-supplement_1.pdf]

**Supplemental Table 1** Percentage of Respondents Reporting Similar Conditions from the National Health Measurement Survey (NHMS) and the 2005 National Health Interview Survey (NHIS)<sup>a</sup>

|                                                           | Age, y, 35-69 |      | Age, y, 70-89 |      |
|-----------------------------------------------------------|---------------|------|---------------|------|
|                                                           | NHMS          | NHIS | NHMS          | NHIS |
| CHD <sup>b</sup> with chest pain medications, (%)         | 6.2           | 5.4  | 13.5          | 21.3 |
| CHD without chest pain medications, (%)                   |               |      |               |      |
| Stroke, (%)                                               | 2.7           | 1.9  | 9.8           | 10.5 |
| Diabetes and using insulin, (%)                           | 10.6          | 8.7  | 20.6          | 16.8 |
| Diabetes and using medications which are not insulin, (%) |               |      |               |      |
| Diabetes without medication, (%)                          |               |      |               |      |
| Arthritis, (%)                                            | 26.9          | 24.3 | 53.5          | 52.0 |
| Asthma, (%)                                               | 6.0           | 10.3 | 7.8           | 9.2  |
| Emphysema, (%)                                            | 1.7           | 1.7  | 6.9           | 5.9  |
| Chronic bronchitis, (%)                                   | 2.6           | 4.6  | 5.8           | 5.3  |
| GI <sup>c</sup> ulcer, (%)                                | 9.7           | 7.8  | 16.7          | 12.8 |

<sup>a</sup> Both survey results are weighted to be nationally representative.

<sup>b</sup> CHD = coronary heart disease

<sup>c</sup> GI = gastrointestinal
